# Supplementary material
Source: PubMed Central journal article supplement (PMC4080865)
Supplement: Supp_Table1.pdf [file Supp_Table1.pdf]

## Supplementary Data

SUPPLEMENTARY TABLE S1. GENE EXPRESSION PROFILE OF APOPTOSIS-RELATED GENES  
IN IODIDE-TREATED NOD.H2<sup>h4</sup> AND CBA/J THYROCYTES

| RefSeq    | Symbol  | Description                                                                 | Fold change (+NaI/-NaI) |                      |
|-----------|---------|-----------------------------------------------------------------------------|-------------------------|----------------------|
|           |         |                                                                             | CBA/J                   | NOD.H2 <sup>h4</sup> |
| NM_009594 | Abl1    | C-abl oncogene 1, nonreceptor tyrosine kinase                               | -2.07                   | -1.47                |
| NM_012019 | Aifm1   | Apoptosis-inducing factor, mitochondrion-associated 1                       | 1.49                    | 1.07                 |
| NM_009652 | Akt1    | Thymoma viral proto-oncogene 1                                              | -1.69                   | -1.70                |
| NM_009673 | Anxa5   | Annexin A5                                                                  | -1.18                   | 1.23                 |
| NM_009684 | Apaf1   | Apoptotic peptidase activating factor 1                                     | -1.82                   | -1.29                |
| NM_007466 | Api5    | Apoptosis inhibitor 5                                                       | -1.38                   | -1.04                |
| NM_030693 | Atf5    | Activating transcription factor 5                                           | -2.26                   | -1.84                |
| NM_007522 | Bad     | BCL2-associated agonist of cell death                                       | 1.18                    | 1.10                 |
| NM_009736 | Bag1    | Bcl2-associated athanogene 1                                                | 1.18                    | -1.01                |
| NM_013863 | Bag3    | Bcl2-associated athanogene 3                                                | -1.11                   | -1.16                |
| NM_007523 | Bak1    | BCL2-antagonist/killer 1                                                    | -1.33                   | -1.14                |
| NM_007527 | Bax     | Bcl2-associated X protein                                                   | -1.28                   | 1.03                 |
| NM_009740 | Bcl10   | B-cell leukemia/lymphoma 10                                                 | -1.55                   | -1.18                |
| NM_009741 | Bcl2    | B-cell leukemia/lymphoma 2                                                  | -1.57                   | 1.72                 |
| NM_009742 | Bcl2a1a | B-cell leukemia/lymphoma 2 related protein A1a                              | -1.29 <sup>a</sup>      | 1.12                 |
| NM_009743 | Bcl2l1  | Bcl2-like 1                                                                 | -1.61                   | -1.20                |
| NM_013479 | Bcl2l10 | Bcl2-like 10                                                                | -2.15                   | -1.51                |
| NM_009754 | Bcl2l11 | BCL2-like 11 (apoptosis facilitator)                                        | -1.37                   | 1.15                 |
| NM_007537 | Bcl2l2  | Bcl2-like 2                                                                 | -1.73                   | -1.38                |
| NM_007544 | Bid     | BH3 interacting domain death agonist                                        | -1.49                   | 1.31                 |
| NM_007465 | Birc2   | Baculoviral IAP repeat-containing 2                                         | -1.39                   | 1.27                 |
| NM_007464 | Birc3   | Baculoviral IAP repeat-containing 3                                         | -1.46                   | 1.47                 |
| NM_009689 | Birc5   | Baculoviral IAP repeat-containing 5                                         | 1.43                    | 1.36                 |
| NM_016787 | Bnip2   | BCL2/adenovirus E1B interacting protein 2                                   | -1.27                   | -1.03                |
| NM_009760 | Bnip3   | BCL2/adenovirus E1B interacting protein 3                                   | -1.16                   | 1.27                 |
| NM_009761 | Bnip3l  | BCL2/adenovirus E1B interacting protein 3-like                              | -1.38                   | 1.15                 |
| NM_016778 | Bok     | BCL2-related ovarian killer protein                                         | -4.06                   | -527.93              |
| NM_130859 | Card10  | Caspase recruitment domain family, member 10                                | -3.80                   | -1.07                |
| NM_009807 | Casp1   | Caspase 1                                                                   | -1.50                   | -1.16                |
| NM_009808 | Casp12  | Caspase 12                                                                  | -1.29                   | 1.05                 |
| NM_009809 | Casp14  | Caspase 14                                                                  | 1.69                    | -2.19 <sup>a</sup>   |
| NM_007610 | Casp2   | Caspase 2                                                                   | -1.18                   | -1.08                |
| NM_009810 | Casp3   | Caspase 3                                                                   | -1.55                   | -1.21                |
| NM_007609 | Casp4   | Caspase 4, apoptosis-related cysteine peptidase                             | -1.23                   | 1.27                 |
| NM_009811 | Casp6   | Caspase 6                                                                   | -1.20                   | 1.33                 |
| NM_007611 | Casp7   | Caspase 7                                                                   | -1.22                   | 1.03                 |
| NM_009812 | Casp8   | Caspase 8                                                                   | -1.33                   | 1.45                 |
| NM_015733 | Casp9   | Caspase 9                                                                   | -2.47                   | 1.01                 |
| NM_011611 | Cd40    | CD40 antigen                                                                | 1.12                    | 1.99                 |
| NM_011616 | Cd40lg  | CD40 ligand                                                                 | -3.68 <sup>c</sup>      | -1.92 <sup>c</sup>   |
| NM_011617 | Cd70    | CD70 antigen                                                                | -1.58 <sup>b</sup>      | -1.18                |
| NM_009805 | Cflar   | CASP8 and FADD-like apoptosis regulator                                     | -1.68                   | -1.25                |
| NM_007702 | Cidea   | Cell death-inducing DNA fragmentation factor, alpha subunit-like effector A | 1.19                    | 1.76                 |
| NM_009894 | Cideb   | Cell death-inducing DNA fragmentation factor, alpha subunit-like effector B | 1.07                    | 1.19                 |
| NM_009950 | Cradd   | CASP2 and RIPK1 domain containing adaptor with death domain                 | -1.43                   | 1.24                 |
| NM_010015 | Dad1    | Defender against cell death 1                                               | 1.31                    | 1.41                 |
| NM_029653 | Dapk1   | Death associated protein kinase 1                                           | -1.69                   | -1.00                |
| NM_010044 | Dffa    | DNA fragmentation factor, alpha subunit                                     | -1.74                   | -1.07                |
| NM_007859 | Dffb    | DNA fragmentation factor, beta subunit                                      | -2.13                   | 1.61                 |
| NM_023232 | Diablo  | Diablo homolog (Drosophila)                                                 | -1.03                   | 1.16                 |
| NM_010175 | Fadd    | Fas (TNFRSF6)-associated via death domain                                   | -1.81                   | -1.08                |

(continued)

SUPPLEMENTARY TABLE S1. (CONTINUED)

| RefSeq    | Symbol    | Description                                                                 | Fold change (+NaI/-NaI) |                      |
|-----------|-----------|-----------------------------------------------------------------------------|-------------------------|----------------------|
|           |           |                                                                             | CBA/J                   | NOD.H2 <sup>b4</sup> |
| NM_007987 | Fas       | Fas (TNF receptor superfamily member 6)                                     | -1.61                   | 1.09                 |
| NM_010177 | FasL      | Fas ligand (TNF superfamily, member 6)                                      | -1.44 <sup>b</sup>      | -1.92 <sup>c</sup>   |
| NM_007836 | Gadd45a   | Growth arrest and DNA-damage-inducible 45 alpha                             | -1.57                   | 1.09                 |
| NM_010513 | Igf1r     | Insulin-like growth factor I receptor                                       | -1.74                   | -1.17                |
| NM_010548 | Il10      | Interleukin 10                                                              | -2.67                   | -1.83                |
| NM_010712 | Lhx4      | LIM homeobox protein 4                                                      | -3.68 <sup>c</sup>      | -3.48                |
| NM_010736 | Ltbr      | Lymphotoxin B receptor                                                      | -1.94                   | -1.27                |
| NM_011949 | Mapk1     | Mitogen-activated protein kinase 1                                          | -1.35                   | 1.03                 |
| NM_008562 | Mcl1      | Myeloid cell leukemia sequence 1                                            | -1.83                   | -1.46                |
| NM_008670 | Naip1     | NLR family, apoptosis inhibitory protein 1                                  | -17.00 <sup>b</sup>     | -1.67                |
| NM_010872 | Naip2     | NLR family, apoptosis inhibitory protein 2                                  | 1.27                    | 1.02                 |
| NM_008689 | Nfkb1     | Nuclear factor of kappa light polypeptide gene enhancer in B-cells 1, p105  | -1.55                   | 1.02                 |
| NM_080637 | Nme5      | Nonmetastatic cells 5, protein expressed in (nucleoside-diphosphate kinase) | -1.43                   | 1.79                 |
| NM_172729 | Nod1      | Nucleotide-binding oligomerization domain containing 1                      | -1.22                   | -1.08                |
| NM_030152 | Nol3      | Nucleolar protein 3 (apoptosis repressor with CARD domain)                  | 1.19                    | 1.04                 |
| NM_011130 | Polb      | Polymerase (DNA directed), beta                                             | -1.16                   | 1.02                 |
| NM_011563 | Prdx2     | Peroxiredoxin 2                                                             | 1.08                    | 1.20                 |
| NM_023258 | Pycard    | PYD and CARD domain containing                                              | 1.02                    | 1.31                 |
| NM_009068 | Ripk1     | Receptor (TNFRSF)-interacting serine-threonine kinase 1                     | -2.11                   | -1.09                |
| NM_013693 | Tnf       | Tumor necrosis factor                                                       | 1.23                    | -1.18                |
| NM_020275 | Tnfrsf10b | Tumor necrosis factor receptor superfamily, member 10b                      | -1.59                   | 1.14                 |
| NM_008764 | Tnfrsf11b | Tumor necrosis factor receptor superfamily, member 11b (osteoprotegerin)    | -1.76                   | -1.26                |
| NM_011609 | Tnfrsf1a  | Tumor necrosis factor receptor superfamily, member 1a                       | -1.34                   | -1.24                |
| NM_009425 | Tnfsf10   | Tumor necrosis factor (ligand) superfamily, member 10                       | 2.36                    | 1.22                 |
| NM_011614 | Tnfsf12   | Tumor necrosis factor (ligand) superfamily, member 12                       | -1.22                   | 1.08                 |
| NM_009421 | Traf1     | Tnf receptor-associated factor 1                                            | 1.34                    | 1.10                 |
| NM_009422 | Traf2     | Tnf receptor-associated factor 2                                            | -1.43                   | 1.18                 |
| NM_011632 | Traf3     | Tnf receptor-associated factor 3                                            | -1.63                   | -1.20                |
| NM_011640 | Trp53     | Transformation related protein 53                                           | -1.26                   | 1.12                 |
| NM_173378 | Trp53bp2  | Transformation related protein 53 binding protein 2                         | -1.51                   | 1.04                 |
| NM_011641 | Trp63     | Transformation related protein 63                                           | -1.62                   | 1.57                 |
| NM_011642 | Trp73     | Transformation related protein 73                                           | -2.10 <sup>a</sup>      | 1.06                 |
| NM_009688 | Xiap      | X-linked inhibitor of apoptosis                                             | -1.62                   | -1.16                |
| NM_007393 | Actb      | Actin, beta                                                                 | -1.22                   | -1.36                |
| NM_009735 | B2m       | Beta-2 microglobulin                                                        | 1.56                    | 1.41                 |
| NM_008084 | Gapdh     | Glyceraldehyde-3-phosphate dehydrogenase                                    | 1.03                    | -1.33                |
| NM_010368 | Gusb      | Glucuronidase, beta                                                         | -1.14                   | 1.12                 |
| NM_008302 | Hsp90ab1  | Heat shock protein 90 alpha (cytosolic), class B member 1                   | -1.15                   | 1.14                 |

For certain indicated genes expression analysis was not made possible due to: (a) nonspecific amplification of the product as indicated by the melting curve analysis; (b) a high threshold cycle (30–35 cycles) in both control and test samples; and (c) an undetermined threshold cycle, that is, greater than the defined cutoff (35 cycles) in both control and test samples.
