# Supplementary material
Source: PubMed Central journal article supplement (PMC4080865)
Supplement: Supp_Table2.pdf [file Supp_Table2.pdf]

SUPPLEMENTARY TABLE S2. GENE EXPRESSION PROFILE OF OXIDATIVE STRESS-RELATED GENES IN NAI-TREATED NOD.H2<sup>h4</sup> AND CBA/J THYROCYTES

| RefSeq       | Symbol | Description                                                                           | Fold change (+Nai/-Nai) |                      |
|--------------|--------|---------------------------------------------------------------------------------------|-------------------------|----------------------|
|              |        |                                                                                       | CBA/J                   | NOD.H2 <sup>h4</sup> |
| NM_009654    | Alb    | Albumin                                                                               | -2.43 <sup>c</sup>      | -3.31 <sup>b</sup>   |
| NM_028717    | Als2   | Amyotrophic lateral sclerosis 2 (juvenile) homolog (human)                            | -1.42                   | -1.19                |
| NM_009676    | Aox1   | Aldehyde oxidase 1                                                                    | -1.34                   | 1.37                 |
| NM_007462    | Apc    | Adenomatosis polyposis coli                                                           | 1.04                    | 1.02                 |
| NM_009696    | ApoE   | Apolipoprotein E                                                                      | 1.80                    | 1.34                 |
| NM_019864    | Atr    | Ataxia telangiectasia and rad3 related                                                | 1.09                    | 1.24                 |
| NM_009804    | Cat    | Catalase                                                                              | 1.42                    | 1.14                 |
| NM_013653    | Ccl5   | Chemokine (C-C motif) ligand 5                                                        | 2.26                    | 1.17                 |
| NM_016892    | Ccs    | Copper chaperone for superoxide dismutase                                             | 1.38                    | -1.18                |
| NM_007798    | Ctsb   | Cathepsin B                                                                           | 1.23                    | -1.27                |
| NM_007806    | Cyba   | Cytochrome b-245, alpha polypeptide                                                   | 1.29                    | 1.08                 |
| NM_030206    | Cygb   | Cytoglobin                                                                            | 1.47                    | -2.19                |
| NM_001039520 | Dnm2   | Dynamamin 2                                                                           | -1.01                   | -1.82                |
| NM_001099297 | Duox1  | Dual oxidase 1                                                                        | 1.48                    | -1.17                |
| NM_153068    | Ehd2   | EH-domain containing 2                                                                | 1.28                    | -1.77                |
| NM_007946    | Epx    | Eosinophil peroxidase                                                                 | -1.91 <sup>b</sup>      | -1.07 <sup>b</sup>   |
| NM_007949    | Ercc2  | Excision repair cross-complementing rodent repair deficiency, complementation group 2 | -1.11                   | -1.60                |
| NM_001081221 | Ercc6  | Excision repair cross-complementing rodent repair deficiency, complementation group 6 | 1.25                    | -1.18                |
| NM_007985    | Fancc  | Fanconi anemia, complementation group C                                               | -1.09                   | -1.20                |
| NM_018881    | Fmo2   | Flavin containing monooxygenase 2                                                     | 2.07                    | -1.13                |
| NM_010239    | Fth1   | Ferritin heavy chain 1                                                                | 2.05                    | -1.02                |
| NM_010295    | Gclc   | Glutamate-cysteine ligase, catalytic subunit                                          | 1.47                    | 1.22                 |
| NM_008129    | Gclm   | Glutamate-cysteine ligase, modifier subunit                                           | 1.69                    | 1.28                 |
| NM_008160    | Gpx1   | Glutathione peroxidase 1                                                              | 1.76                    | -1.07                |
| NM_030677    | Gpx2   | Glutathione peroxidase 2                                                              | 3.14                    | 2.55                 |
| NM_008161    | Gpx3   | Glutathione peroxidase 3                                                              | 1.64                    | -1.56                |
| NM_008162    | Gpx4   | Glutathione peroxidase 4                                                              | 2.03                    | -1.04                |
| NM_010343    | Gpx5   | Glutathione peroxidase 5                                                              | -1.07 <sup>b</sup>      | 2.34 <sup>b</sup>    |
| NM_145451    | Gpx6   | Glutathione peroxidase 6                                                              | 1.74 <sup>b</sup>       | 2.57 <sup>b</sup>    |
| NM_024198    | Gpx7   | Glutathione peroxidase 7                                                              | 2.64                    | -1.04                |
| NM_010344    | Gsr    | Glutathione reductase                                                                 | 1.69                    | -1.06                |
| NM_008180    | Gss    | Glutathione synthetase                                                                | 1.48                    | -1.05                |
| NM_029555    | Gstk1  | Glutathione S-transferase kappa 1                                                     | 1.72                    | 1.12                 |
| NM_013541    | Gstp1  | Glutathione S-transferase, pi 1                                                       | 1.81                    | 1.08                 |
| NM_010442    | Hmox1  | Heme oxygenase (decycling) 1                                                          | 1.99                    | 1.20                 |
| NM_010479    | Hspa1a | Heat shock protein 1A                                                                 | 1.96                    | 1.02                 |
| NM_010497    | Idh1   | Isocitrate dehydrogenase 1 (NADP+), soluble                                           | 1.86                    | 1.05                 |
| NM_026298    | Ift172 | Intraflagellar transport 172 homolog (Chlamydomonas)                                  | 1.03                    | -1.33                |
| NM_001009940 | Il19   | Interleukin 19                                                                        | -1.03 <sup>b</sup>      | 1.02 <sup>b</sup>    |
| NM_016971    | Il22   | Interleukin 22                                                                        | 2.16 <sup>b</sup>       | -1.22                |
| NM_008473    | Krt1   | Keratin 1                                                                             | 1.09 <sup>a</sup>       | -3.64 <sup>b</sup>   |
| NM_080420    | Lpo    | Lactoperoxidase                                                                       | 1.02 <sup>a</sup>       | 2.57 <sup>b</sup>    |
| NM_013593    | Mb     | Myoglobin                                                                             | 2.01                    | -1.49                |
| NM_010824    | Mpo    | Myeloperoxidase                                                                       | 3.20                    | -1.40                |
| NM_010876    | Ncf1   | Neutrophil cytosolic factor 1                                                         | 1.28                    | -1.77                |
| NM_010877    | Ncf2   | Neutrophil cytosolic factor 2                                                         | 2.96                    | -1.03                |
| NM_022414    | Ngb    | Neuroglobin                                                                           | 1.38                    | -1.94                |
| NM_010927    | Nos2   | Nitric oxide synthase 2, inducible                                                    | -1.05 <sup>a</sup>      | -5.40 <sup>a</sup>   |
| NM_172203    | Nox1   | NADPH oxidase 1                                                                       | 2.30 <sup>b</sup>       | 1.26 <sup>b</sup>    |
| NM_015760    | Nox4   | NADPH oxidase 4                                                                       | 1.92                    | -1.54                |
| NM_172204    | Noxa1  | NADPH oxidase activator 1                                                             | 4.11 <sup>a</sup>       | 2.97 <sup>a</sup>    |
| NM_027988    | Noxo1  | NADPH oxidase organizer 1                                                             | 1.42                    | 2.09                 |
| NM_008706    | Nqo1   | NAD(P)H dehydrogenase, quinone 1                                                      | 2.89                    | 2.37                 |
| NM_020569    | Park7  | Parkinson disease (autosomal recessive, early onset) 7                                | 2.49                    | -1.03                |
| NM_011034    | Prdx1  | Peroxiredoxin 1                                                                       | 2.97                    | 1.12                 |
| NM_011563    | Prdx2  | Peroxiredoxin 2                                                                       | 2.43                    | -1.03                |
| NM_007452    | Prdx3  | Peroxiredoxin 3                                                                       | 1.82                    | 1.02                 |

(continued)

SUPPLEMENTARY TABLE S2. (CONTINUED)

| RefSeq    | Symbol    | Description                                                  | Fold change (+ NaI/- NaI) |                      |
|-----------|-----------|--------------------------------------------------------------|---------------------------|----------------------|
|           |           |                                                              | CBA/J                     | NOD.H2 <sup>h4</sup> |
| NM_016764 | Prdx4     | Peroxiredoxin 4                                              | 1.91                      | -1.16                |
| NM_012021 | Prdx5     | Peroxiredoxin 5                                              | 2.27                      | -1.03                |
| NM_007453 | Prdx6     | Peroxiredoxin 6                                              | 1.91                      | -1.17                |
| NM_011170 | Prnp      | Prion protein                                                | 1.48                      | -1.21                |
| NM_011186 | Psmb5     | Proteasome (prosome, macropain) subunit, beta type 5         | 2.18                      | 1.04                 |
| NM_008969 | Ptgs1     | Prostaglandin-endoperoxide synthase 1                        | 1.42                      | -1.31                |
| NM_011198 | Ptgs2     | Prostaglandin-endoperoxide synthase 2                        | 1.37                      | -1.30                |
| NM_009020 | Rag2      | Recombination activating gene 2                              | 1.08                      | 1.91                 |
| NM_058214 | Recq4     | RecQ protein-like 4                                          | 1.53                      | -1.55                |
| NM_009127 | Scd1      | Stearoyl-Coenzyme A desaturase 1                             | 1.92                      | -1.12                |
| NM_173052 | Serpinb1b | Serine (or cysteine) peptidase inhibitor, clade B, member 1b | 2.87                      | 1.08                 |
| NM_134086 | Slc38a1   | Solute carrier family 38, member 1                           | 1.19                      | -1.39                |
| NM_011434 | Sod1      | Superoxide dismutase 1, soluble                              | 3.57                      | 1.02                 |
| NM_013671 | Sod2      | Superoxide dismutase 2, mitochondrial                        | 1.38                      | -1.35                |
| NM_011435 | Sod3      | Superoxide dismutase 3, extracellular                        | 1.20                      | -1.56                |
| NM_011018 | Sqstm1    | Sequestosome 1                                               | 1.18                      | 1.20                 |
| NM_029688 | Srxn1     | Sulfiredoxin 1 homolog (S. cerevisiae)                       | 1.22                      | 1.04                 |
| NM_009417 | Tpo       | Thyroid peroxidase                                           | 5.77                      | 1.65                 |
| NM_011660 | Txn1      | Thioredoxin 1                                                | 2.13                      | 1.40                 |
| NM_023719 | Txnip     | Thioredoxin interacting protein                              | 2.62                      | 1.40                 |
| NM_015762 | Txnrd1    | Thioredoxin reductase 1                                      | 1.63                      | -1.26                |
| NM_013711 | Txnrd2    | Thioredoxin reductase 2                                      | 1.93                      | -1.09                |
| NM_153162 | Txnrd3    | Thioredoxin reductase 3                                      | 1.41                      | -1.21                |
| NM_011671 | Ucp2      | Uncoupling protein 2 (mitochondrial, proton carrier)         | 2.01                      | -1.24                |
| NM_009464 | Ucp3      | Uncoupling protein 3 (mitochondrial, proton carrier)         | 2.15                      | -1.67                |
| NM_011701 | Vim       | Vimentin                                                     | 1.88                      | -1.21                |
| NM_011728 | Xpa       | Xeroderma pigmentosum, complementation group A               | 1.51                      | -1.00                |
| NM_007393 | Actb      | Actin, beta                                                  | -1.10                     | -1.36                |
| NM_009735 | B2m       | Beta-2 microglobulin                                         | -1.19                     | 1.31                 |
| NM_008084 | Gapdh     | Glyceraldehyde-3-phosphate dehydrogenase                     | 1.27                      | -1.16                |
| NM_010368 | Gusb      | Glucuronidase, beta                                          | 1.03                      | 1.21                 |
| NM_008302 | Hsp90ab1  | Heat shock protein 90 alpha (cytosolic), class B member 1    | 1.00                      | -1.00                |

For certain indicated genes expression analysis was not made possible due to: (a) nonspecific amplification of the product as indicated by the melting curve analysis; (b) a high threshold cycle (30–35 cycles) in both control and test samples; and (c) an undetermined threshold cycle i.e. greater than the defined cutoff (35 cycles) in both control and test samples.
